# Supplementary material for: Optimized photo-stimulation of halorhodopsin for long-term neuronal inhibition
Source: PubMed Central journal article supplement (PMC6882325; doi:10.1186/s12915-019-0717-6), 2019-11-27

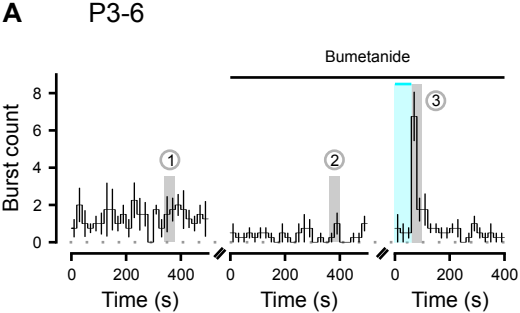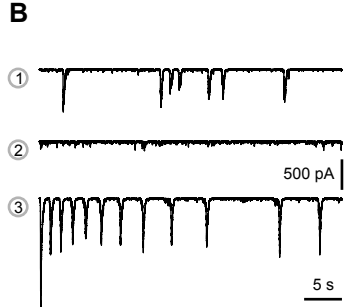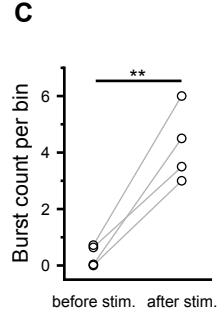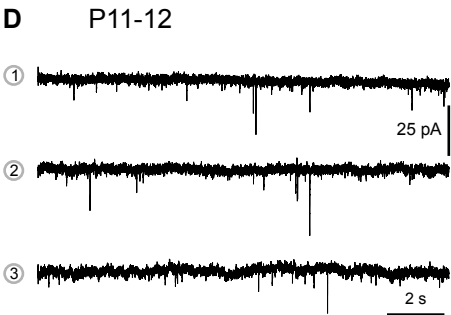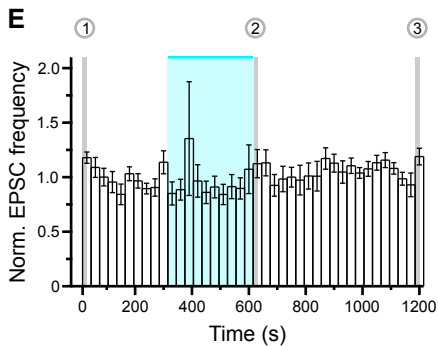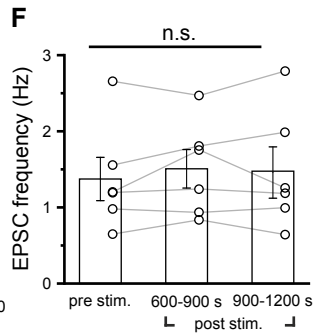

Supplement: 12915_2019_717_MOESM2_ESM.pdf [file 12915_2019_717_MOESM2_ESM.pdf]
